# Supplementary material for: Plasma Free Thiol Levels during Early Sepsis Predict Future Renal Function Decline
Source: MDPI journal article supplement (doi:10.3390/antiox11050800), 2022-04-19
Supplement: s1 [file s1]

# Supplemental

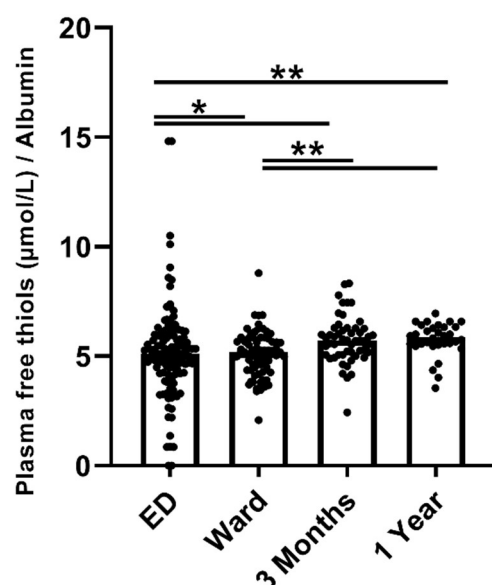

**Figure S1. Course of albumin adjusted plasma free thiols.** Albumin adjusted plasma free thiols at the emergency department, at the ward, and 3 months and 1 year after hospital discharge. Statistical analysis was performed using Wilcoxon matched-pairs signed test. Bars represent the median, dots represent individual levels. \* means  $p < 0.05$ , \*\*  $p < 0.01$ . ED; emergency department.

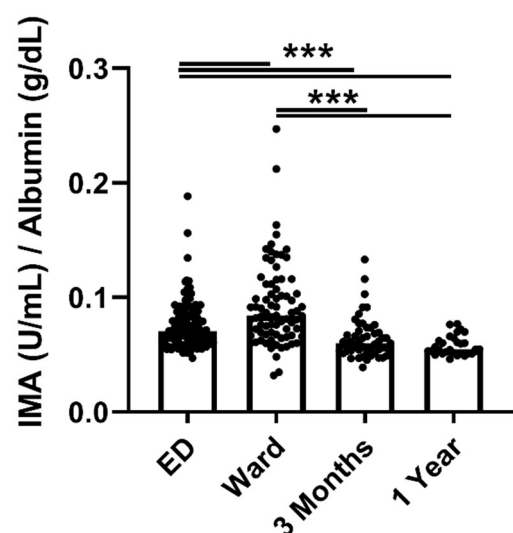

**Figure S2. Course of albumin adjusted IMA in septic patients.** IMA concentrations at the ED, the ward, at 3 months and one year after hospital admission. Statistical analysis were performed using Wilcoxon matched-pairs signed test. Bars represent the median, dots represent individual levels. \*\*\* means  $p < 0.001$ . ED: emergency department, IMA: ischemia-modified albumin.

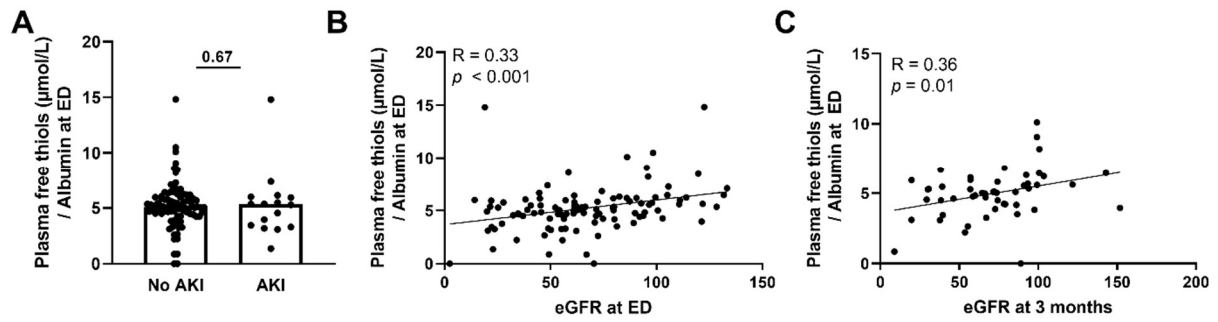

**Figure S3. Correlation of albumin adjusted plasma free thiols with kidney function.** (A) albumin adjusted plasma free thiols in patients with and without AKI. (B) Correlation of albumin adjusted plasma free thiols at ED and eGFR at ED. (C) Correlation of albumin adjusted plasma free thiols at ED and eGFR at three months. Statistical analysis were performed using Mann Whitney u test. Bars represent the median, dots represent individual levels. ED: emergency department, eGFR: estimated glomerular filtration rate.
